# Supplementary material
Source: PubMed Central journal article supplement (PMC6504583)
Supplement: NIHMS1524212-supplement-1.pdf [file NIHMS1524212-supplement-1.pdf]

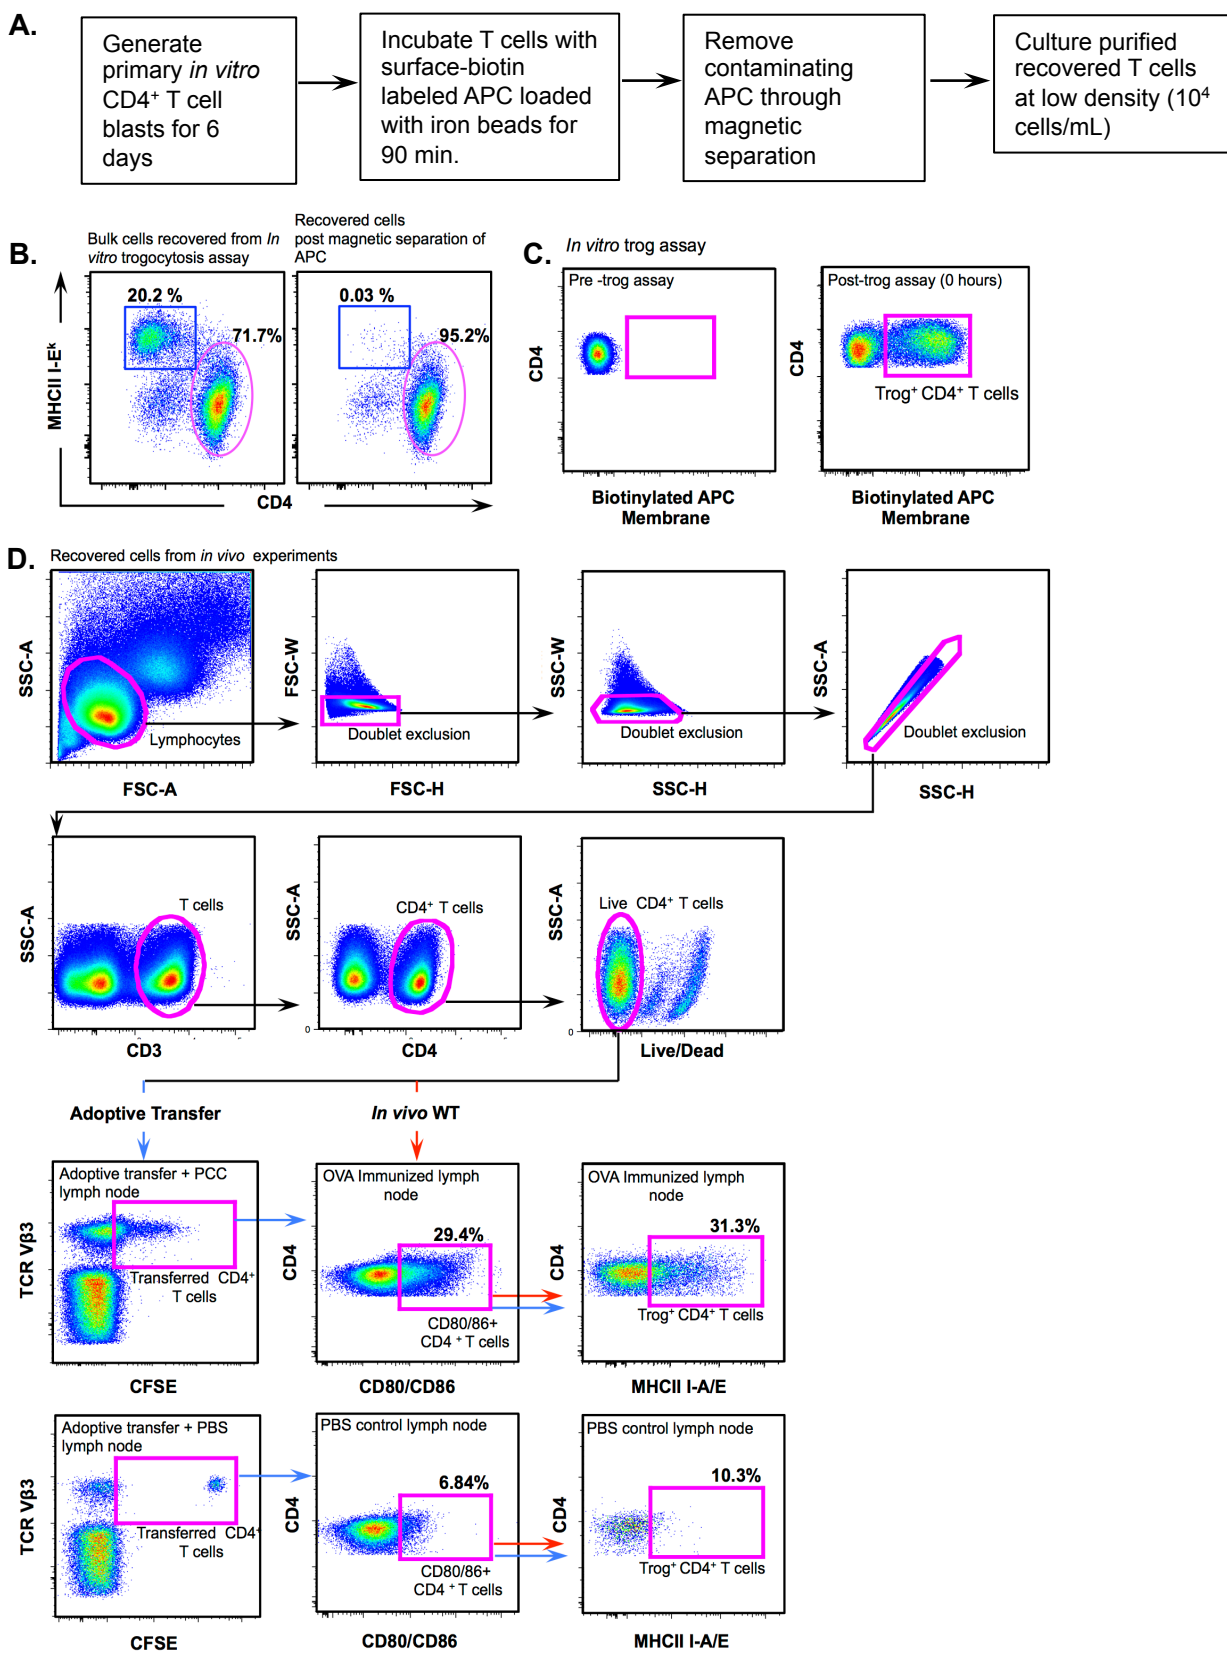

**Supplemental Figure 1.** *Trog*<sup>+</sup> cells generated *in vitro* are identified by presence of APC membrane, *in vivo* generated *trog*<sup>+</sup> cells are identified by presence of CD80/CD86 and MHCII (A) Schematic timeline of a standard *in vitro* trogocytosis assay. (B) Purity of CD4<sup>+</sup> T cells following recovery from an *in vitro* trogocytosis assay. APC shown in square box and CD4<sup>+</sup> cells are shown in the oval gate. Plots show recovered samples pre-magnetic separation (*left*) and post-magnetic separation of APC (*right*). (C) Identification of *in vitro* generated *trog*<sup>+</sup> cells as determined by the presence of trogocytosed APC membrane. (D) Gating scheme for identification of adoptively transferred (*blue arrow*) and wild-type (*red arrow*), *in vivo* generated *trog*<sup>+</sup> CD4<sup>+</sup> T cells.

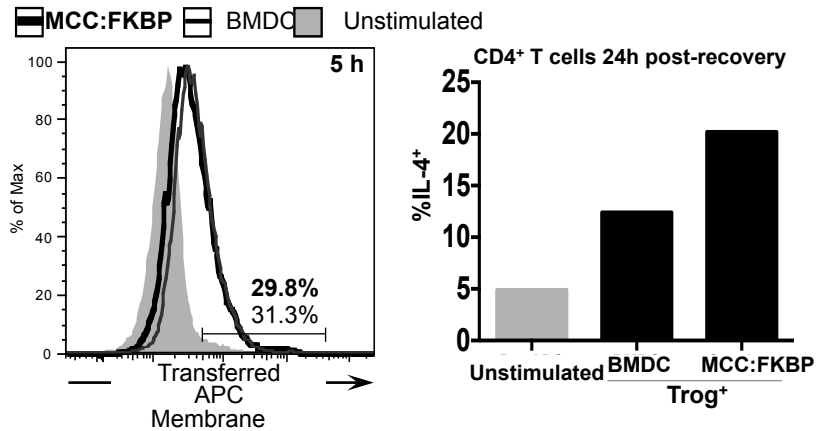

**Supplemental Figure 2.** *CD4<sup>+</sup> T cells perform trogocytosis at similar frequencies from BMDC and MCC:FKBP fibroblasts, and the frequency of IL-4<sup>+</sup> trog<sup>+</sup> cells is similar 24 hours later.* BMDC and MCC:FKBP fibroblasts were used as APC in parallel standard *in vitro* trogocytosis-assays. **(Left)** Histograms showing frequency, and levels of trogocytosed APC membrane from BMDC (*thin grey line*) and MCC:FKBP fibroblasts (*thick black line*), with unstimulated cells (*shaded grey*) for comparison. Numbers represent frequency of trog<sup>+</sup> cells from respective APC. **(Right)** Frequency of unstimulated IL-4<sup>+</sup> cells (*grey*), IL-4<sup>+</sup> trog<sup>+</sup> cells recovered from a standard trogocytosis-assay using MCC-pulsed BMDC (*middle*) and MCC:FKBP fibroblasts (*right*), 24 hours post-recovery.

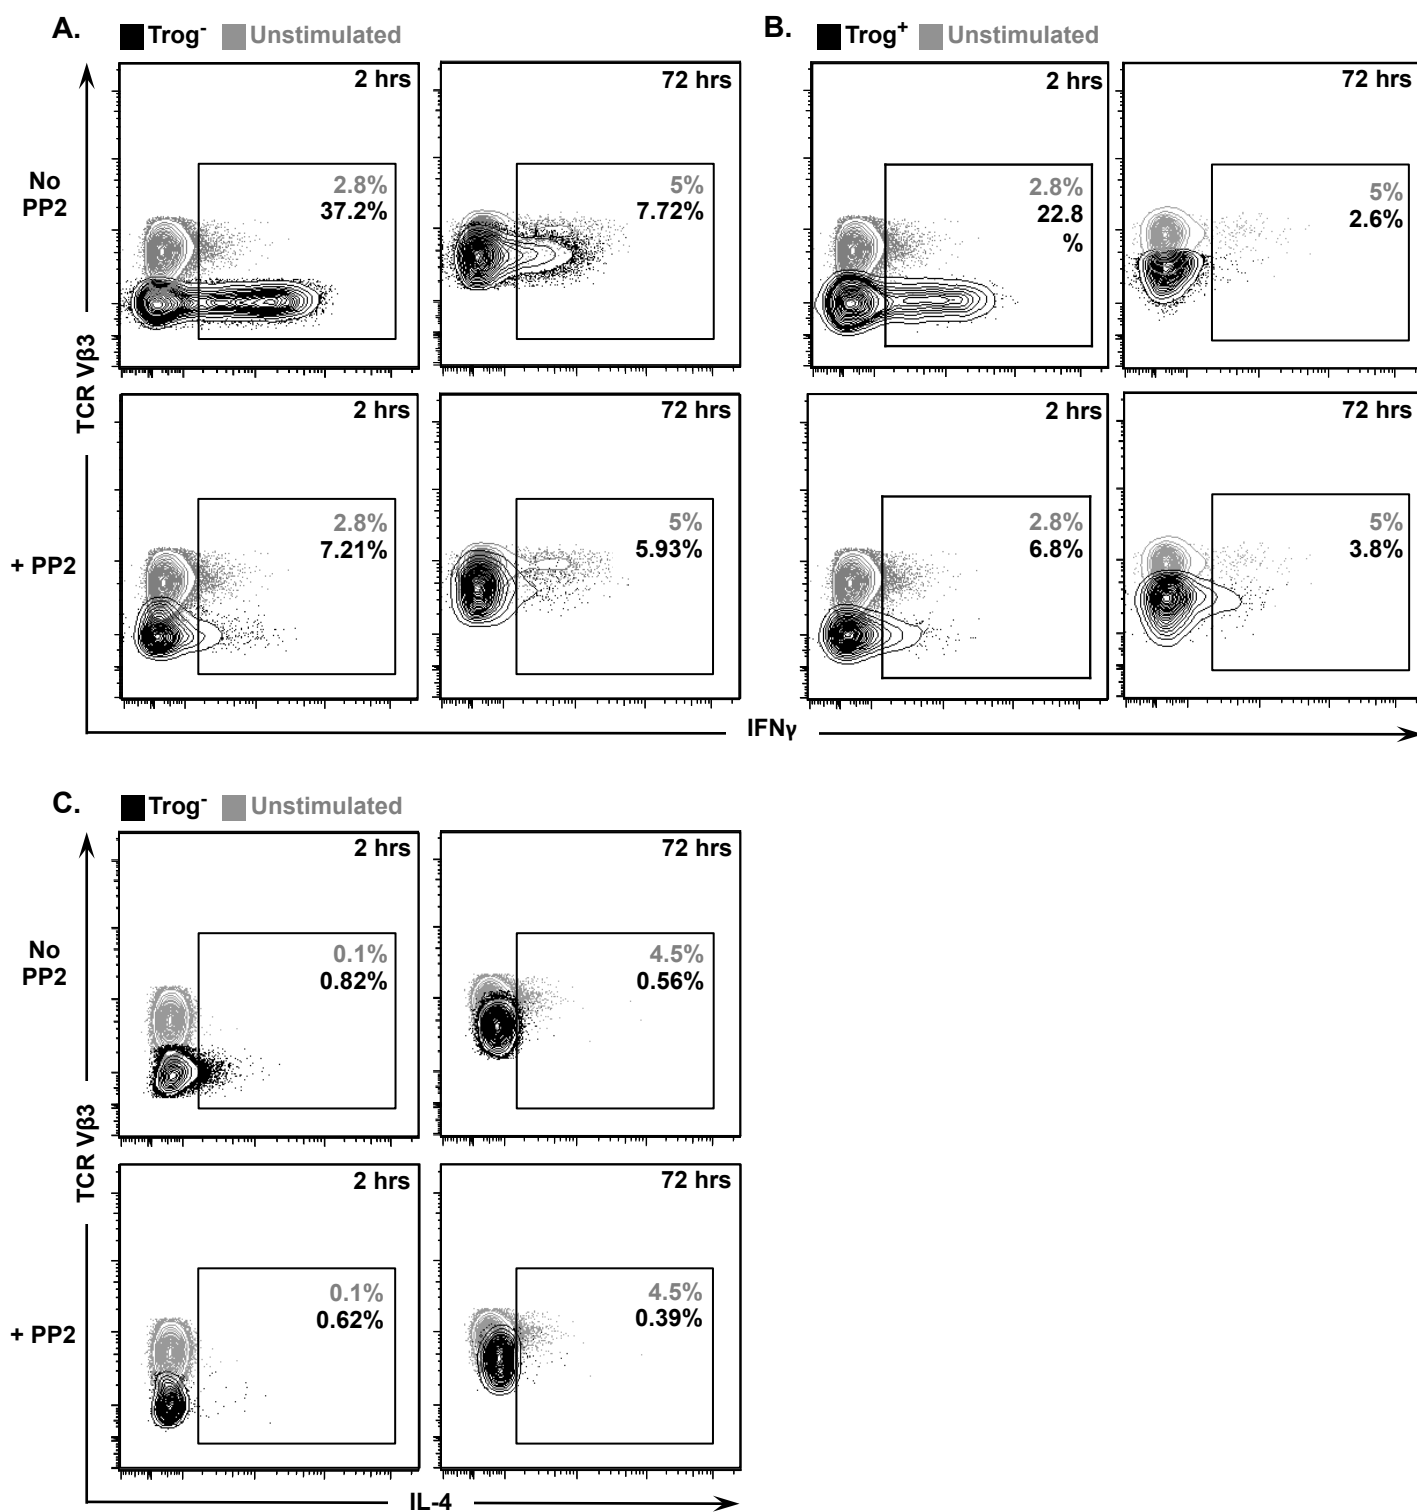

**Supplemental Figure 3.** *IFN $\gamma$  expression in trog<sup>+</sup> and trog<sup>-</sup> cells is dependent on signals from APC, PP2-treated and untreated trog<sup>-</sup> cells do not express IL-4.* After recovery from an *in vitro* trogocytosis assay, cells were left untreated (*top row*) or were treated for 20 minutes with 20  $\mu$ M PP2 (*bottom row*) to halt TCR signaling. Cells were analyzed for surface TCR levels and intracellular cytokine expression 2 (*left column*), or 72 hours (*right column*) after removal of PP2. (**A & B**) IFN $\gamma$  and TCR V $\beta$ 3 levels of (**A**) trog<sup>-</sup> cells, and (**B**) trog<sup>+</sup> cells. (**C**) IL-4 and TCR V $\beta$ 3 levels of trog<sup>-</sup> cells. Data is representative of three separate experiments.

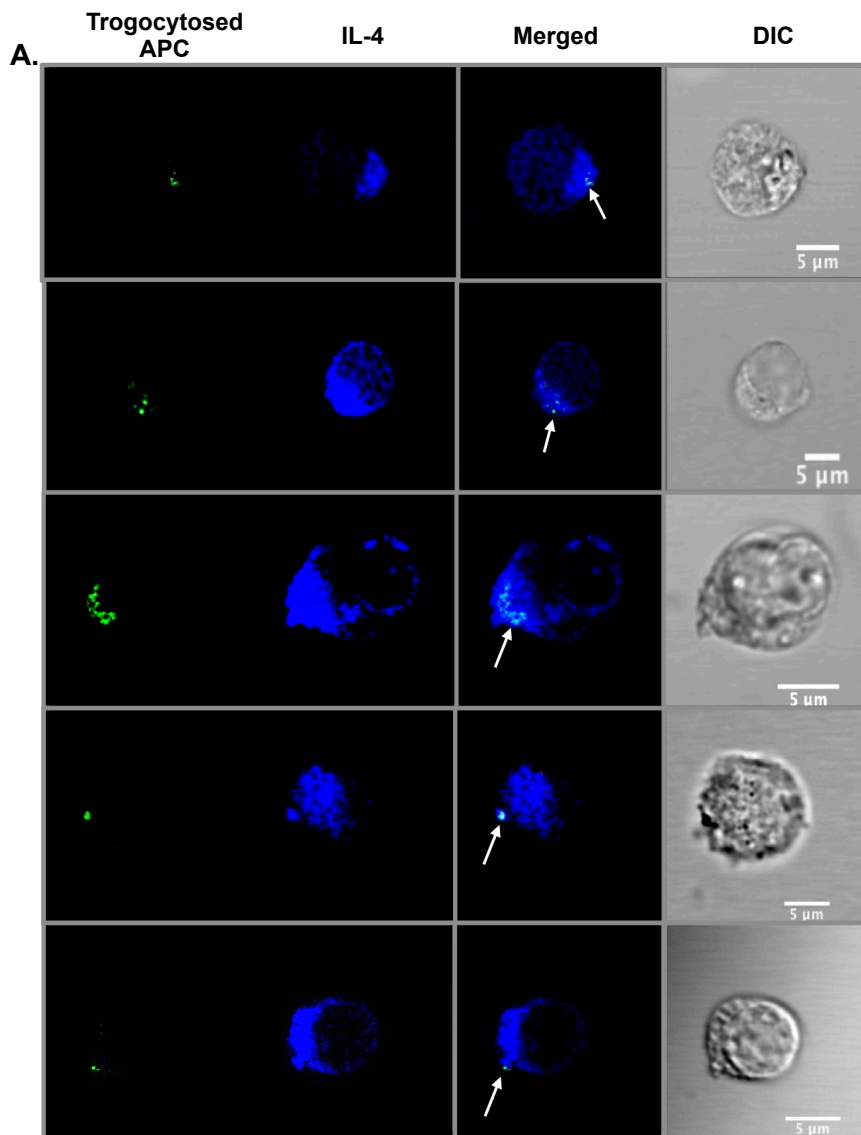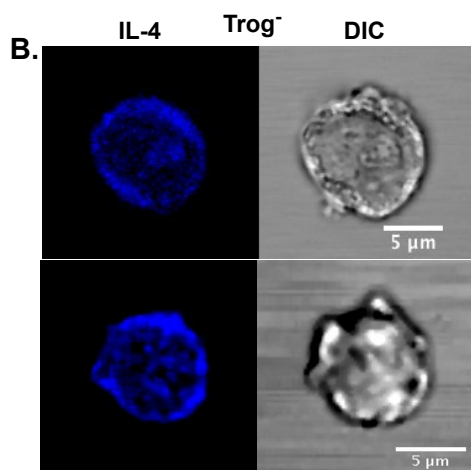

**Supplemental Figure 4.** Intracellular IL-4 is polarized towards trocytosed molecules. (A) Additional representative images show trog<sup>+</sup> cells 72 hours post recovery, with trocytosed APC molecules (green) and IL-4 (blue). In merged images (second from right), arrows point to trocytosed molecules. (B) IL-4<sup>+</sup> trog<sup>-</sup> cells 72 hours post recovery, with IL-4 shown in blue.
